# Supplementary material
Source: HighWire-hosted journal article supplement (http://www.cmaj.ca/highwire/filestream/74392/field_highwire_adjunct_files/0/190564-com-1-at.pdf)

Appendix 1 (as supplied by the authors)

# Diabetes, Obesity and Nutrition Strategic Clinical Network

## Transformational Roadmap Summary 2017-2021

**AHS VISION:** Healthy Albertans. Healthy Communities. Together.

**DON SCN MISSION:** To bring people together to integrate research and innovation within quality care in order to promote equitable, seamless and sustainable healthcare services related to diabetes, obesity and nutrition for all Albertans.

**DON SCN VISION:** All Albertans have access to services and supports that optimize their nutritional status, prevent or reduce the risk of diabetes, obesity, and malnutrition, and enable those living with these chronic diseases to be healthy as well.

|                             | 1                                                                                                                                                                                                                           | 2                                                                                                                                                                                                                                                                                                                                                                       | 3                                                                                                                                                                                                                                                                                                                                                                                                                                     |
|-----------------------------|-----------------------------------------------------------------------------------------------------------------------------------------------------------------------------------------------------------------------------|-------------------------------------------------------------------------------------------------------------------------------------------------------------------------------------------------------------------------------------------------------------------------------------------------------------------------------------------------------------------------|---------------------------------------------------------------------------------------------------------------------------------------------------------------------------------------------------------------------------------------------------------------------------------------------------------------------------------------------------------------------------------------------------------------------------------------|
| <b>STRATEGIC DIRECTIONS</b> | Prevent the onset and progression of diabetes, obesity and malnutrition                                                                                                                                                     | Empower patients and providers to better manage diabetes, obesity and malnutrition to live well and long                                                                                                                                                                                                                                                                | Transform the health care system through research, surveillance and partnerships                                                                                                                                                                                                                                                                                                                                                      |
| <b>PRIORITIES</b>           | <p>Standardize diabetic foot care across Alberta</p> <p>Create new obesity management models in the community</p> <p>Develop a Malnutrition Strategy for screening assessment and treatment of people with malnutrition</p> | <p>Improve hospital glycemic management and facilitate patient self-management of diabetes in-hospital</p> <p>Develop an understanding of the impact of malnutrition in patients' lives and perceived barriers to a healthy diet</p> <p>People with diabetes and primary providers understand the importance of and practice evidence-based foot screening and care</p> | <p>Develop an Alberta Diabetes Registry that will inspire future research and new health service delivery models in diabetes management</p> <p>Translate PRIHS 1.0 research findings into standards that improve the care of patients with obesity in hospital</p> <p>Build capacity for innovation and research through new partnerships with Alberta Innovates, industry, universities, Alberta Health, Alberta Health Services</p> |

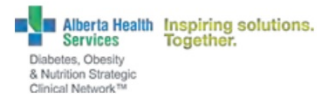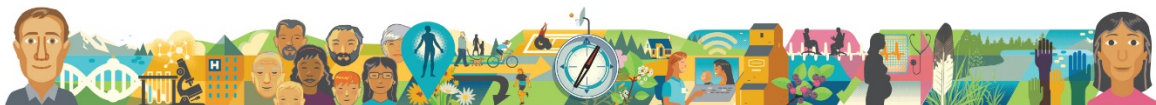

Supplement: 190564-com-1-at.pdf [file 190564-com-1-at.pdf]
